# Supplementary material
Source: PubMed Central journal article supplement (PMC5850848)
Supplement: dex246suppl_figure2.pdf [file dex246suppl_figure2.pdf]

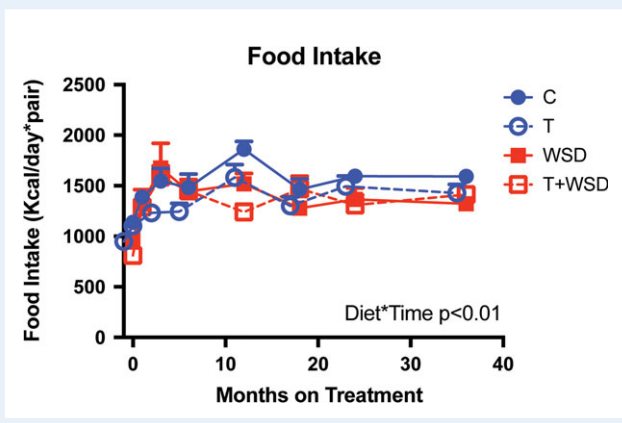

**Supplementary Figure S2** Longitudinal analysis of caloric intake. Food intake was evaluated in Control (C), Testosterone (T), western-style diet (WSD), and T + WSD treatment groups at time 0 and following 3, 6, 12, 18, 24 and 36 months of treatment. Food intake was measured for 5–14 days, with average calories/pair per day calculated for each time point. Values are the mean  $\pm$  SEM with  $n = 10$ /group. Significant effect of diet, over time as determined by a mixed models ANOVA is presented as text within the graph.
