# Supplementary material
Source: PubMed Central journal article supplement (PMC5850848)
Supplement: dex246suppl_figure3.pdf [file dex246suppl_figure3.pdf]

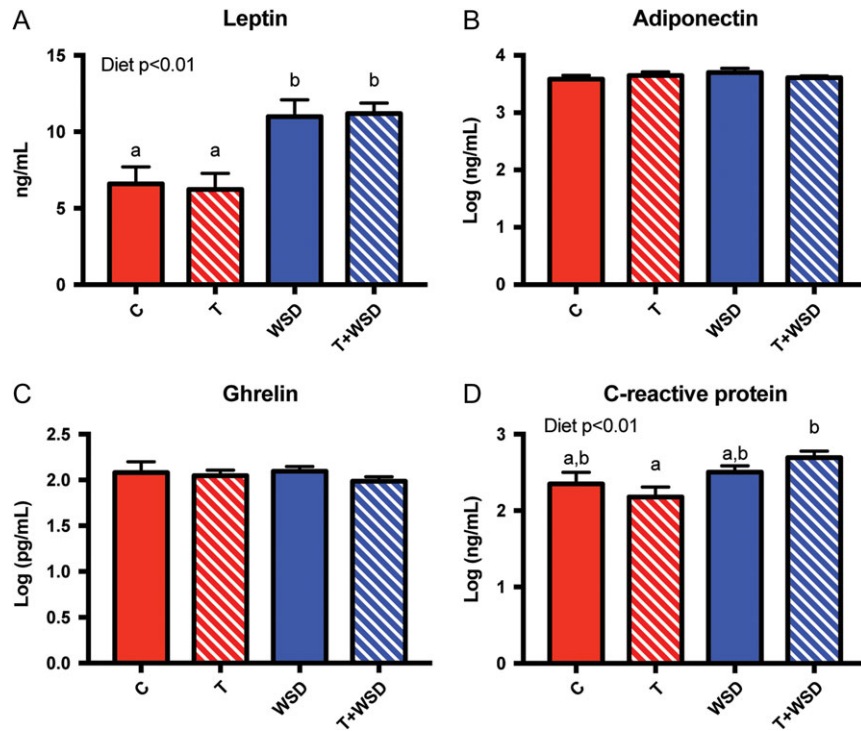

**Supplementary Figure S3** Serum hormone levels following 36 months of Control (C), Testosterone (T), western-style diet (WSD) and T + WSD treatment. Fasted serum leptin (A), adiponectin (B), ghrelin (C) and C-reactive protein (CRP) (D) values were collected immediately prior to the 36-month glucose tolerance test. Values presented are the mean  $\pm$  SEM with  $n = 10$ /group. Two-way ANOVA effects are presented as text within the graphs. Different letters denote significant differences between groups.
